# Supplementary material for: Multiple 9-1-1 complexes promote homolog synapsis, DSB repair, and ATR signaling during mammalian meiosis
Source: eLife journal article supplement (doi:10.7554/elife.68677), 2022-01-17
Supplement: fig1-data3 [file elife-68677-fig1-data3-v1.pdf]

Data to create tSNE plots for figure 1 supplement figures 1B-D can be found at GEO and are accessible through Series accession number GSE121904. Source code is available at: <https://github.com/nyuhuyang/scRNAseq-SSCs> . Further information can be found at the original paper: <https://doi.org/10.1371/journal.pgen.1007810>.
