# Supplementary material for: Multiple 9-1-1 complexes promote homolog synapsis, DSB repair, and ATR signaling during mammalian meiosis
Source: eLife. 2022 Feb 8;11:e68677. doi: 10.7554/eLife.68677 (PMC8824475; doi:10.7554/eLife.68677)
Supplement: Figure 1—source data 2. — Relative expression of 9-1-1 complex subunits and genes involved in ATR signaling. These data were used for Figure 1C. Original data are accessible through GEO series accession number GSE121904. [file elife-68677-fig1-data2.xlsx]

## Sheet: Sheet1
Data used for Figure 1C- 9-1-1: expression analysis from mouse testes
Original data have been deposited at GEO and are accessible through Series accession number GSE121904.
Source: https://journals.plos.org/plosgenetics/article?id=10.1371/journal.pgen.1007810
	Spermatogonia	Spermatocytes	Sertoli Cells
Rad1	0.184901	0.230832	0.141116
Rad9a	0.112757	0.019236	0.0755768
Rad9b	0.262655	0.461798	0.0289317
Hus1	0.140279	0.0668551	0.089157
Hus1b	0.0561115	0.0523272	0.00177133
Atr	0.508744	0.877859	0.285775
Topbp1	0.821633	0.409336	0.507191
Etaa1	0.575544	0.0677967	0.237949
Chek1	0.212422	0.0107614	0.0832526
Hormad1	0.30701	1.29258	0.00472355
Hormad2	0.17261	0.205408	0.000590444
