# Supplementary material for: Multiple 9-1-1 complexes promote homolog synapsis, DSB repair, and ATR signaling during mammalian meiosis
Source: eLife. 2022 Feb 8;11:e68677. doi: 10.7554/eLife.68677 (PMC8824475; doi:10.7554/eLife.68677)
Supplement: Figure 2—source data 1. [file elife-68677-fig2-data1.xlsx]

## Sheet: Sheet1
Figure 2 - Source data 1			**Data used for Fig2D
	Genotype	Age	Body Weight (g)	Average Testes Weight (mg)	% Testis weight normalized to BW
	Control	P8	4.35	5.8	0.12
			5.73	6.05	0.106
			4.86	3.7	0.076
	Rad1 CKO	P8	4.56	4.6	0.101
			4.76	4.42	0.093
			5.27	4.63	0.088
	Control	4 weeks	17.07	71	0.416
			16.19	66	0.408
			18.83	72	0.382
	Rad1 CKO	4 weeks	17.31	26.5	0.153
			16.52	27.5	0.166
			17.5	18	0.103
	Control	12 weeks	22.739	108	0.475
			25.764	99.9	0.388
			24.3	106.15	0.437
			23.07	103.2	0.447
			25.15	105	0.417
			23.94	98.4	0.411
			25.54	109.7	0.43
			24.84	111.9	0.45
			24.26	98.75	0.407
			24.65	107	0.434
	Rad1 CKO	12 weeks	22.6	29.65	0.131
			28.38	41.2	0.145
			21.8	26.15	0.12
			22.21	26.85	0.121
			29.83	31	0.104
			29.82	42	0.141
			25.55	27.5	0.108
			22.43	24.75	0.103
			21.49	28.75	0.134
			24.03	24.75	0.103
			25.72	31.1	0.121
