# Supplementary material for: Multiple 9-1-1 complexes promote homolog synapsis, DSB repair, and ATR signaling during mammalian meiosis
Source: eLife. 2022 Feb 8;11:e68677. doi: 10.7554/eLife.68677 (PMC8824475; doi:10.7554/eLife.68677)
Supplement: Figure 2—source data 2. [file elife-68677-fig2-data2.xlsx]

## Sheet: Sheet1
Figure 2 - Source data 2			**Data used for Fig2G
	Genotype	Age	n tubules	average TUNEL+ cells
	Control	P8	50	0.28
			50	0.06
			50	0.26
			50	0.18
	Rad1 CKO		50	0.48
			50	0.24
			50	0.24
			50	0.04
	Control	4 weeks	50	0.52
			50	0.86
			50	0.08
	Rad1 CKO		50	3.28
			50	2.44
			50	1.6
	Control	12 weeks	50	0.68
			50	0.2
			50	0.94
	Rad1 CKO		50	2.18
			50	1.3
			50	2.62
