# Supplementary material for: Multiple 9-1-1 complexes promote homolog synapsis, DSB repair, and ATR signaling during mammalian meiosis
Source: eLife. 2022 Feb 8;11:e68677. doi: 10.7554/eLife.68677 (PMC8824475; doi:10.7554/eLife.68677)
Supplement: Figure 2—source data 3. [file elife-68677-fig2-data3.xlsx]

## Sheet: Sheet1
Figure 2- Source data 3				**Data used for Fig2-supplement2D
	Genotype	Age	n tubules	average TRA98+ cells	SD TRA98+ cells
	Control	P8	62	22.7419	8.66108
			65	25.3231	7.7623
			75	25.0933	7.1531
	Rad1 CKO		78	21.7436	7.88956
			67	26.597	8.12042
			66	22.7727	6.53934
	Control	4 weeks	50	216.14	55.9522
			40	248.35	86.5346
			40	196.25	41.0558
	Rad1 CKO		52	68.3654	38.6137
			53	73.2075	31.6114
			50	83.12	40.7639
	Control	12 weeks	30	264.633	90.7161
			30	293.733	88.6939
			30	204.6	49.2283
	Rad1 CKO		64	38.6406	30.9266
			54	54.7778	44.0076
			52	50	40.6978
