# Supplementary material for: Multiple 9-1-1 complexes promote homolog synapsis, DSB repair, and ATR signaling during mammalian meiosis
Source: eLife. 2022 Feb 8;11:e68677. doi: 10.7554/eLife.68677 (PMC8824475; doi:10.7554/eLife.68677)
Supplement: Figure 2—source data 4. [file elife-68677-fig2-data4.xlsx]

## Sheet: Sheet1
Figure 2- Source data 4				**Data used for Fig2-supplement2E
	Genotype	Age	n tubules	average LIN28+ cells	SD LIN28+ cells
	Control	P8	58	7.86207	4.18623
			53	8.5283	3.38324
			55	10.0545	2.82462
	Rad1 CKO		53	8.28916	3.30384
			50	8.18	2.49645
			50	10.22	3.72685
	Control	4 weeks	50	9.72	6.03405
			66	10.197	5.82625
			50	10.36	5.50236
	Rad1 CKO		50	8.24	4.81
			50	5.9	4.7
			50	8.33	4.85
	Control	12 weeks	50	8.06	4.32
			51	10.45	6.1
			51	9.1	5.74
	Rad1 CKO		50	5.86	3.33
			53	6	3.55
			50	7.2	4.8
