# Supplementary material for: Multiple 9-1-1 complexes promote homolog synapsis, DSB repair, and ATR signaling during mammalian meiosis
Source: eLife. 2022 Feb 8;11:e68677. doi: 10.7554/eLife.68677 (PMC8824475; doi:10.7554/eLife.68677)
Supplement: Figure 3—source data 1. [file elife-68677-fig3-data1.xlsx]

## Sheet: Sheet1
Figure 3- Source data 1
Data used for Fig3-supplement 1A
3 control mice, n= 34 cells; 3 Rad1 CKO mice, n=38 normal and n=40 abnormal cells
		Rad1 CKO
	Control	Normal	Abnormal
	138	113	0
	145	112	0
	167	77	0
	144	123	0
	209	91	0
	109	76	0
	129	94	0
	114	108	0
	114	79	0
	138	109	0
	131	100	0
	138	153	0
	125	114	0
	123	160	0
	141	173	0
	128	81	0
	110	78	0
	120	66	0
	123	132	0
	108	128	0
	102	73	0
	127	72	0
	113	121	0
	121	68	0
	113	135	0
	111	135	0
	105	125	0
	80	98	0
	153	109	0
	133	112	0
	159	126	0
	177	98	0
	109	121	0
	132	97	0
		93	0
		97	0
		102	0
		86	0
			0
			0
