# Supplementary material for: Multiple 9-1-1 complexes promote homolog synapsis, DSB repair, and ATR signaling during mammalian meiosis
Source: eLife. 2022 Feb 8;11:e68677. doi: 10.7554/eLife.68677 (PMC8824475; doi:10.7554/eLife.68677)
Supplement: Figure 3—source data 2. [file elife-68677-fig3-data2.xlsx]

## Sheet: Sheet1
Figure 3-Source data 2
Data used for Fig3-supplement 2B
n=3 mice each genotype
	Total synapsed chromosomes	% cells
Rad1 CKO Pachytene-like cells n cells= 131	4	12.2
	5	8.4
	6	7.6
	7	5.3
	8	2.3
	9	5.3
	10	3.1
	11	1.5
	12	2.3
	13	2.3
	14	0.8
	15	0.8
	16	3.8
	17	2.3
	18	1.5
	19	40.5
Control n cells = 156	19	100
