# Supplementary material for: Multiple 9-1-1 complexes promote homolog synapsis, DSB repair, and ATR signaling during mammalian meiosis
Source: eLife. 2022 Feb 8;11:e68677. doi: 10.7554/eLife.68677 (PMC8824475; doi:10.7554/eLife.68677)
Supplement: Figure 3—source data 3. [file elife-68677-fig3-data3.xlsx]

## Sheet: Sheet1
Figure 3- Source data 3
Data used for Fig3-supplement 2E
n=2 mice each genotype
	Control	Rad1 CKO
	21	0
	23	0
	30	0
	22	0
	23	0
	23	0
	26	0
	24	0
	28	0
	27	0
	24	0
	27	0
	27	0
	25	0
	25	0
	27	0
	22	0
	27	0
	28	0
	26	0
	24	0
	30	0
	22	0
	32	0
	26	0
	21	0
	29	0
	20	0
	27	0
	26	0
	24	0
	29	0
	23	0
	25	0
	24	0
	26	0
	23	0
	22
	23
	25
	27
	25
	26
	23
	22
	20
	21
	24
	26
	30
	24
	25
	25
	25
	21
	23
	22
	24
	28
	20
	24
	19
	22
	22
	26
	25
	26
	27
	18
	24
	27
	29
	29
	21
	27
	20
	20
	21
	22
	26
	28
