# Supplementary material for: Multiple 9-1-1 complexes promote homolog synapsis, DSB repair, and ATR signaling during mammalian meiosis
Source: eLife. 2022 Feb 8;11:e68677. doi: 10.7554/eLife.68677 (PMC8824475; doi:10.7554/eLife.68677)
Supplement: Figure 4—source data 1. [file elife-68677-fig4-data1.xlsx]

## Sheet: RPA
Figure 4 - Source data 1			RPA COUNTS
Data for Fig4B
n=3 mice each genotype
	Leptonema		Zygonema		Pachyenma
	Control	Rad1 CKO	Control	Rad1 CKO	Control	Rad1 CKO
	285	173	278	85	26	104
	178	148	277	46	16	79
	176	99	261	55	23	107
	205	95	264	73	19	110
	157	142	204	72	19	96
	131	119	227	80	17	84
	131		189	76	20	58
	144	175	292	157	24	87
	140	108	294	124	24	75
	214	164	0	102	24	139
	262	182	0	134	19	73
	252	216		67	20	113
	0	129		149	23	87
				133	27	79
				90	20	109
				86	20	74
				102	19	51
				53	24	62
				39	25	60
				121	17	54
				87	24	65
				60	23	28
				69	19	66
				65	23	85
				70	20	57
				94	22	48
				63	30	84
				88	22	97
				58	20	80
				82	22	147
				75	22	102
				77	28	132
				77	31	95
				195	28	93
				116	25	65
				188	52	60
				242	60	92
				59	92	72
				49	51	96
				228	70	106
				215	90	87
				161	95	60
				126	70	102
				155	94	157
				130	69	193
				234	97	233
				185	132	191
				176	103	183
				247	121	121
				238	106	122
				169	117	159
				140	104	220
				193	110
				119	112
				53	116
				24	141
				37	123
				62	125
				68

## Sheet: MEIOB
Figure 4- Source data 1			MEIOB COUNTS
Data for Fig4D
n=3 mice each genotype
	Leptonema		Zygonema		Pachyenma
	Control	Rad1 CKO	Control	Rad1 CKO	Control	Rad1 CKO
	192	130	183	163	107	158
	188	83	199	145	107	146
	211	158	199	166	132	159
	177	158	178	184	133	145
	168	77	259	140	141	105
	213	102	258	63	142	126
	168	122	191	182	155	127
	283	90	278	178	134	85
	209	92	275	146	93	115
	225	168	221	128	109	168
	252	121	228	174	95	164
	233	195	238	185	130	33
	241	139	242	73	131	127
	261		155	184	134	202
	231		162	159	134	149
	216		202	202	139	152
	209		188	205	101	114
	206		207	235	120	122
	232		225	139	120	131
	362		244	214	141	136
	307		269	167	141	121
	256		191	106	142	121
	259		192	106	83	121
			309	179	84	121
			186	176	68	121
			170	181	128	208
			226	179	129	209
			225	208	160	135
				142	109	176
				124	130	175
				176	60	132
				175	57	66
				177	57	66
				172	58	39
				127	58	93
				221	143	179
				102	141	123
				103	124	137
				197	98	118
				186	99	108
				186	133	145
				176	134	116
				130	97	143
				106	145	174
				104	134	134
				176	136
				162	136
				85	124
				120	114
				86	113
				126	103
				107	110
				114	110
				135	110
				175	111
				215	111
					97
					97
					98
					98
					109
					109
					109
					121
					116
					117
					59
					123
					120
					196

## Sheet: RAD51
Figure 4- Source data 1			RAD51 COUNTS
Data for Fig4F
n=5 Control mice
n=6 Rad1 CKO mice
	Leptonema		Zygonema		Pachyenma
	Control	Rad1 CKO	Control	Rad1 CKO	Control	Rad1 CKO
	126	83	152	51	13	71
	119	211	127	52	13	45
			124	50	13	41
	201	182		112	10	66
	207	91	193		9	16
	176	96	179	126	12	61
	184	133	169	144	18	45
	158	123	180	148	11	28
	234	131	140	35	15	107
	166	119	140	26	9	119
	206	157	183	33	14
	201	167	167	141	8	103
	202		133	109	13	22
	152	52	155	92	7	61
	190	69	149	41	11	40
	180	100	151	106	9	12
	187	99	133	96	3	18
	213	90	211		12	26
	144	99	140	62	8	16
	188	78	144	55	13	24
	169	81	167	76	12	83
	237	152	148	68	4	97
	153		128	82	13	72
	212		119	96	6	59
	211		128	111	8
	221		132	114	8	34
	237		157	87	11	72
	218		163	87		85
	215		207	64	13	66
			164	67	10	91
	187		182	89	8	58
	195		78	92	8	82
	211		150	75	4	67
	180		163	104	3	94
	198			100	3	86
	215		156	80	6	83
	208		164		4	48
	182		128	80	2	109
			145	75	6
	212		107	64	5	50
	236		119	49	11	40
	189		98	33	9
	146		92	78	12
	185		106	65	8
	182		154	72	11
	204		84	62
	231		105	47	8
	227		115	44	13
	220		91	62	12
	221		90	56	12
	233		65	43	13
			105		15
			119		13
			112		14
			147		10
			125		7
			99		7
			156		6
			136		11
			150		21
			134		18
			197		15
			139		14
			195		12
			240		10
			179
			86		17
			168		30
			150		15
			132		20
			144		27
			118		13
			109		18
			80		14
			94		15
			87		12
			124		16
			176		13
			41		13
					9
			117		12
			150		16
			164		19
			160		13
			107		11
			172		15
			187		8
			82		13
			100
			91
			153

## Sheet: 5Gy IR RAD51 
Figure 4 - Source data 1			5GY IR RAD51 COUNTS
Data for Fig4H
n=5 Control mice
n=6 Rad1 CKO mice
	Untreated Mice				5GY IR Treated Mice
	Leptonema		Zygonema		Leptonema		Zygonema
	Control	Rad1 CKO	Control	Rad1 CKO	Control	Rad1 CKO	Control	Rad1 CKO
	160	59	121	93	194	78	243	62
	171	160	148	114	213	88	243	66
	123	99	177	112	183	143	172	63
	149	135	133	104	278	75	158	71
	132	92	118	82	247	109	151	67
	130	64	156	86	208	117	178	84
	169	142	163	95	194	111	210	116
	194		152	77	213	83	224	154
	251		100	44	251	76	225	99
	235		105	46	104	75	226	143
	139		102	52	180	59	246	100
	166		135	106	141	57	201	88
	186		122	43	150	140	261	105
	210		141		160	116	241	77
	144		128		149	82	240	127
	173		162		115	99	242	83
	173		73		127	95	209	70
	176		70		114	107	245	102
	170		104		104	130	253	91
	140		76				214	68
	123		89				186	90
	89		93				149	111
	110		89				161	112
	141						209	81
							133	66
							154	85
							159	84
							78	62
							100	84
							90	87
							137	72
							172	70
							140	86
							115	77
							92	89
							159	59
							119	82
							131	111
								103
								64
								93
								86
								106

## Sheet: 5Gy IR RPA
Figure 4 - source data 1			5GY IR RPA COUNTS
Data for Fig4-supplement 1D
n=2 Control mice
n=2 Rad1 CKO mice
	Untreated Mice				5GY IR Treated Mice
	Leptonema		Zygonema		Leptonema		Zygonema
	Control	Rad1 CKO	Control	Rad1 CKO	Control	Rad1 CKO	Control	Rad1 CKO
	257	110	313	202	247	141	287	124
	228	79	311	131	242	40	253	166
	229	91	264	133	212	92	221	96
	229	106	209	188	225	57	258	108
	202	50	245	207	322	96	227	188
	200	228	249	195	341	152	229	140
	189	231	218	192		125	313	169
	105	144	261	189	238	96	359	188
	215	207	206	171	304	85	373	199
	110	176	262	146	297	158	311	244
		181	266	133	236	113		177
		106	321	278	258	136		248
		227	288	138	303	147		122
		79	249	168	285
		113	238	155	314
		94	280	126	264
		193	258	178	292
		136	305	146
		206	258	155
		221	245	172
		58	254	150
		93	226	270
		72	294	268
		89	297	220
		98	167	239
		84	193	170
			188	114
				135
				171
				175
				135
				174
				138
				129
				225
				214
				176
				137
				138
				235
				182
				151
				141
				171
				159
				173
				75
